# Supplementary material for: The role of histone methylation in the development of digestive cancers: a potential direction for cancer management
Source: PubMed Central journal article supplement (PMC7398912; doi:10.1038/s41392-020-00252-1), 2020-08-03
Supplement: 41392_2020_252_MOESM1_ESM.pdf [file 41392_2020_252_MOESM1_ESM.pdf]

This document certifies that the manuscript

The role of histone methylation in the development of digestive cancers: a potential direction for cancer management

prepared by the authors

Yuan Chen, Bo Ren, Jinshou Yang, Huanyu Wang, Gang Yang, Ruiyuan Xu, Lei You, Yupei Zhao

was edited for proper English language, grammar, punctuation, spelling, and overall style by one or more of the highly qualified native English speaking editors at SNAS.

This certificate was issued on **June 17, 2020** and may be verified on the [SNAS website](#) using the verification code **9CAD-64BB-16BC-EF99-124P**.

Neither the research content nor the authors' intentions were altered in any way during the editing process. Documents receiving this certification should be English-ready for publication; however, the author has the ability to accept or reject our suggestions and changes. To verify the final SNAS edited version, please visit our verification page at [secure.authorservices.springernature.com/certificate/verify](https://secure.authorservices.springernature.com/certificate/verify).

If you have any questions or concerns about this edited document, please contact SNAS at [support@as.springernature.com](mailto:support@as.springernature.com).
